# Supplementary material for: Making a case for power-sensitive water modelling: a literature review
Source: Copernicus journal article supplement (doi:10.5194/hess-28-4157-2024), 2024-09-12
Supplement: Supplementary file 1 [file hess-28-4157-2024-supplement.zip]

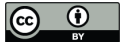

## *Supplement of*

# **Making a case for power-sensitive water modelling: a literature review**

**Rozemarijn ter Horst et al.**

*Correspondence to:* Rozemarijn ter Horst ([rozemarijn.terhorst@wur.nl](mailto:rozemarijn.terhorst@wur.nl))

- [hess-28-4157-2024-supplement-title-page.pdf](#)
- [Overview Systemic Literature Review Power Sensitive Modelling - June 2024.xls](#)

The copyright of individual parts of the supplement might differ from the article licence.
